# Supplementary material for: Protoporphyrin incorporated alginate hydrogel: preparation, characterization and fluorescence imaging in vivo
Source: Royal Society of Chemistry journal article supplement (doi:10.1039/c5ra19285d), 2015-01-01
Supplement: c5ra19285d1.pdf [file c5ra19285d1.pdf]

## Supplementary information: Characterization of PPOR-Alginate copolymer

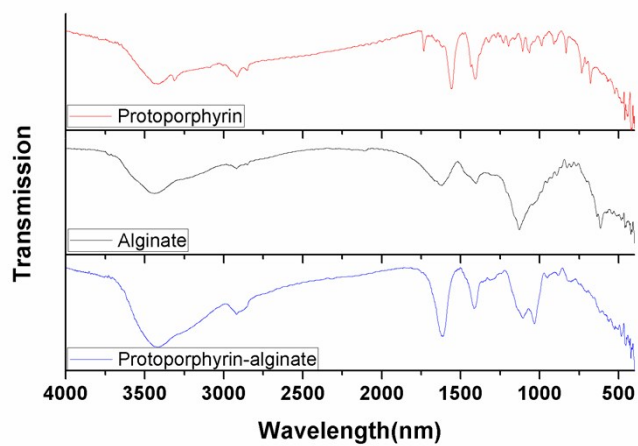

Fig.S1 IR spectra of protoporphyrin, alginate and PPOR-alginate copolymer

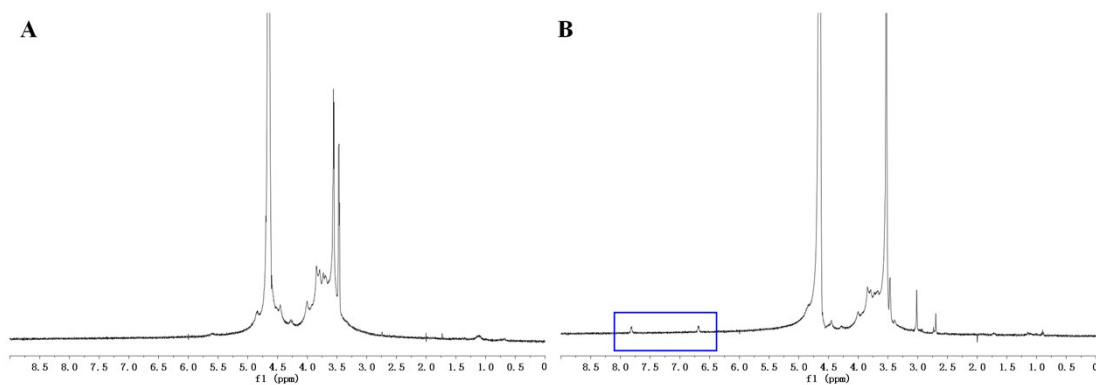

Fig.S2 H-NMR spectra of alginate (A) and PPOR-alginate copolymer (B)

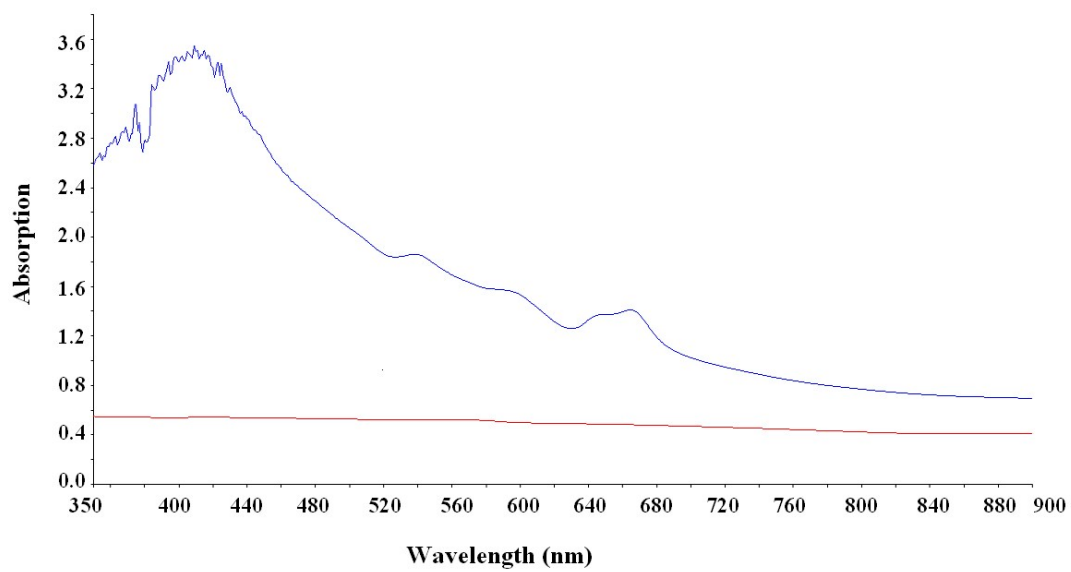

**Fig.S3** UV-Vis spectra of calcium alginate (blue) and calcium PPOR-alginate copolymer (red)

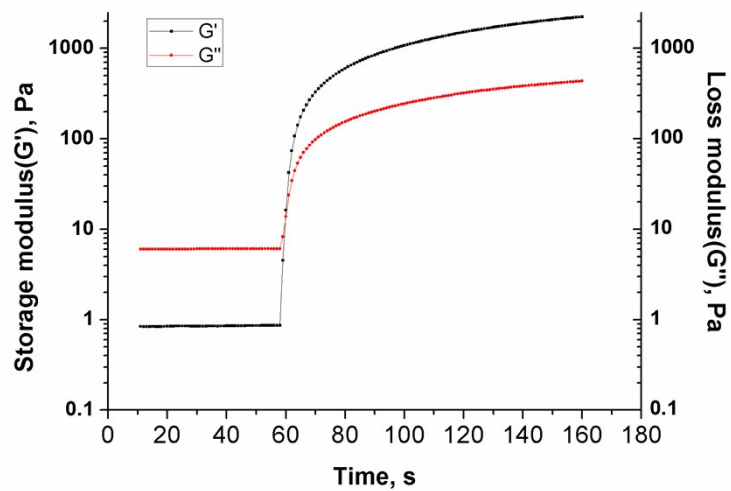

**Fig.S4** Rheological analysis of calcium PPOR-alginate hydrogel

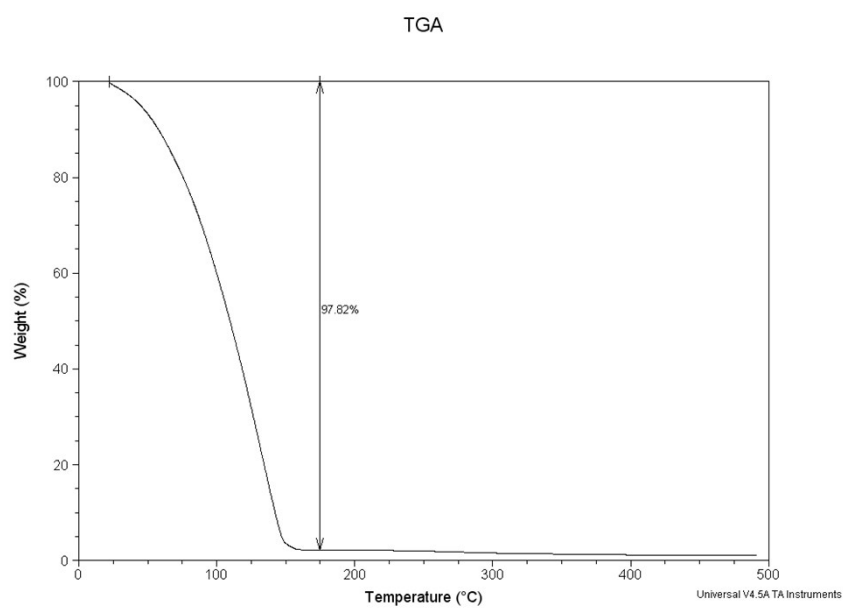

**Fig.S5** TGA curve of calcium PPOR-alginate hydrogel
